# Supplementary material for: Sirukumab, a human anti-interleukin-6 monoclonal antibody: a randomised, 2-part (proof-of-concept and dose-finding), phase II study in patients with active rheumatoid arthritis despite methotrexate therapy
Source: PubMed Central journal article supplement — Ann Rheum Dis. 2014 Apr 3;73(9):1616–25. doi: 10.1136/annrheumdis-2013-205137 (PMC4145446; doi:10.1136/annrheumdis-2013-205137), 2014-04-03
Supplement: annrheumdis-2013-205137-s1.pdf [file annrheumdis-2013-205137-s1.pdf]

**Supplemental Table 1. Shifts from baseline to postbaseline values in lipid concentrations in Part B**

|                                                    | Sirukumab |                                      |            |            |           |           | All sirukumab |
|----------------------------------------------------|-----------|--------------------------------------|------------|------------|-----------|-----------|---------------|
|                                                    | Placebo   | Placebo →<br>Sirukumab<br>100 mg q2w | 100 mg q2w | 100 mg q4w | 50 mg q4w | 25 mg q4w |               |
| Treated patients, n                                | 30        | 26                                   | 30         | 30         | 30        | 31        | 147           |
| <b>Total cholesterol (mg/dL)</b>                   |           |                                      |            |            |           |           |               |
| Patients with normal value (≤200) at baseline, n   | 14        | 12                                   | 14         | 16         | 16        | 20        | 78            |
| Patients with abnormal value (>200) at week 24     | 0         | 5 (42)                               | 8 (57)     | 9 (56)     | 8 (50)    | 14 (70)   | 44 (56)       |
| Patients with normal value (≤200) at week 24       | 0         | 7 (58)                               | 4 (29)     | 5 (31)     | 5 (31)    | 5 (25)    | 26 (33)       |
| Patients with unknown value at week 24             | 14 (100)  | 0                                    | 2 (14)     | 2 (13)     | 3 (19)    | 1 (5)     | 8 (10)        |
| Patients with abnormal value (>200) at baseline, n | 15        | 13                                   | 15         | 13         | 12        | 11        | 64            |
| Patients with abnormal value (>200) at week 24     | 1 (7)     | 12 (92)                              | 14 (93)    | 10 (77)    | 11 (92)   | 9 (82)    | 56 (88)       |
| Patients with normal value (≤200) at week 24       | 0         | 0                                    | 0          | 2 (15)     | 1 (8)     | 2 (18)    | 5 (8)         |
| Patients with unknown values at week 24            | 14 (93)   | 1 (8)                                | 1 (7)      | 1 (8)      | 0         | 0         | 3 (5)         |
| <b>HDL cholesterol (mg/dL)</b>                     |           |                                      |            |            |           |           |               |
| Patients with normal value (≥40) at baseline, n    | 24        | 21                                   | 27         | 26         | 27        | 31        | 132           |
| Patients with abnormal value (<40) at week 24      | 0         | 1 (5)                                | 0          | 0          | 1 (4)     | 0         | 2 (2)         |
| Patients with normal value (≥40) at week 24        | 1 (4)     | 19 (91)                              | 24 (89)    | 24 (92)    | 23 (85)   | 30 (97)   | 120 (91)      |
| Patients with unknown value at week 24             | 23 (96)   | 1 (5)                                | 3 (11)     | 2 (8)      | 3 (11)    | 1 (3)     | 10 (8)        |
| Patients with abnormal value (<40) at baseline, n  | 5         | 4                                    | 2          | 3          | 1         | 0         | 10            |
| Patients with abnormal value (<40) at week 24      | 0         | 2 (50)                               | 0          | 0          | 0         | 0         | 2 (20)        |
| Patients with normal value (≥40) at week 24        | 0         | 2 (50)                               | 2 (100)    | 2 (67)     | 1 (100)   | 0         | 7 (70)        |
| Patients with unknown value at week 24             | 5 (100)   | 0                                    | 0          | 1 (33)     | 0         | 0         | 1 (10)        |
| <b>LDL cholesterol (mg/dL)</b>                     |           |                                      |            |            |           |           |               |
| Patients with normal value (≤130) at baseline, n   | 20        | 17                                   | 20         | 21         | 21        | 25        | 104           |

|                                                    |          |         |         |         |         |         |          |
|----------------------------------------------------|----------|---------|---------|---------|---------|---------|----------|
| Patients with abnormal value (>130) at week 24     | 0        | 6 (35)  | 7 (35)  | 7 (33)  | 9 (43)  | 7 (28)  | 36 (35)  |
| Patients with normal value (≤130) at week 24       | 0        | 11 (65) | 11 (55) | 11 (52) | 9 (43)  | 17 (68) | 59 (57)  |
| Patients with unknown value at week 24             | 20 (100) | 0       | 2 (10)  | 3 (14)  | 3 (14)  | 1 (4)   | 9 (9)    |
| Patients with abnormal value (>130) at baseline, n | 9        | 8       | 9       | 8       | 7       | 6       | 38       |
| Patients with abnormal value (>130) at week 24     | 1 (11)   | 7 (88)  | 5 (56)  | 6 (75)  | 6 (86)  | 5 (83)  | 29 (76)  |
| Patients with normal value (≤130) at week 24       | 0        | 0       | 3 (33)  | 2 (25)  | 1 (14)  | 1 (17)  | 7 (18)   |
| Patients with unknown value at week 24             | 8 (89)   | 1 (13)  | 1 (11)  | 0       | 0       | 0       | 2 (5)    |
| <hr/>                                              |          |         |         |         |         |         |          |
| Triglycerides (mg/dL)                              |          |         |         |         |         |         |          |
| Patients with normal value (≤250) at baseline, n   | 28       | 25      | 28      | 29      | 28      | 30      | 140      |
| Patients with abnormal value (>250) at week 24     | 0        | 0       | 0       | 0       | 0       | 1 (3)   | 1 (1)    |
| Patients with normal value (≤250) at week 24       | 1 (4)    | 24 (96) | 25 (89) | 26 (90) | 25 (89) | 28 (93) | 128 (91) |
| Patients with unknown value at week 24             | 27 (96)  | 1 (4)   | 3 (11)  | 3 (10)  | 3 (11)  | 1 (3)   | 11 (8)   |
| Patients with abnormal value (>250) at baseline, n | 1        | 0       | 1       | 0       | 0       | 1       | 2        |
| Patients with abnormal value (>250) at week 24     | 0        | 0       | 0       | 0       | 0       | 1 (100) | 1 (50)   |
| Patients with normal value (≤250) at week 24       | 0        | 0       | 1 (100) | 0       | 0       | 0       | 1 (50)   |
| Patients with unknown value at week 24             | 1 (100)  | 0       | 0       | 0       | 0       | 0       | 0        |

Data are presented as n or n (%). HDL, high-density lipoprotein; LDL, low-density lipoprotein
