# Supplementary material for: Sirukumab, a human anti-interleukin-6 monoclonal antibody: a randomised, 2-part (proof-of-concept and dose-finding), phase II study in patients with active rheumatoid arthritis despite methotrexate therapy
Source: PubMed Central journal article supplement — Ann Rheum Dis. 2014 Apr 3;73(9):1616–25. doi: 10.1136/annrheumdis-2013-205137 (PMC4145446; doi:10.1136/annrheumdis-2013-205137), 2014-04-03
Supplement: annrheumdis-2013-205137-s2.pdf [file annrheumdis-2013-205137-s2.pdf]

**Supplemental Table 2. Derived sirukumab pharmacokinetic parameters**

| PK Parameters                          | Part A*                                  |                                        | Part B                     |                            |                        |                           |                            |                            |                                        |                        |
|----------------------------------------|------------------------------------------|----------------------------------------|----------------------------|----------------------------|------------------------|---------------------------|----------------------------|----------------------------|----------------------------------------|------------------------|
|                                        | First Dose<br>100 mg<br>every 2<br>weeks | 6th Dose<br>100 mg<br>every 2<br>weeks | 100 mg<br>every 2<br>weeks | 100 mg<br>every 4<br>weeks | 50 mg every<br>4 weeks | 25 mg<br>every 4<br>weeks | 100 mg<br>every 2<br>weeks | 100 mg<br>every 4<br>weeks | Last dose<br>50 mg<br>every 4<br>weeks | 25 mg every 4<br>weeks |
| n                                      | 14                                       | 11                                     | 29                         | 29                         | 28                     | 31                        | 26                         | 22                         | 21                                     | 28                     |
| C <sub>max</sub> (µg/mL)               | 7.50<br>(2.91)                           | 20.01<br>(4.40)                        | 6.60 (3.03)                | 6.73<br>(2.73)             | 2.99 (1.51)            | 1.86<br>(1.11)            | 15.68<br>(7.07)            | 9.34<br>(4.31)             | 4.26<br>(1.73)                         | 2.93 (1.29)            |
| t <sub>max</sub> (day)                 | 3.9<br>[2.2, 13.8]                       | 4.0<br>[3.0, 7.0]                      | 4.9<br>[2.8, 10.7]         | 5.0<br>[3.0, 13.9]         | 5.4<br>[2.9, 12.6]     | 5.0<br>[2.9, 27.8]        | 5.0<br>[0, 9.7]            | 4.0<br>[0, 7.1]            | 5.0<br>[0, 7.0]                        | 4.0<br>[2.8, 11.7]     |
| AUC <sub>(t1-t2)</sub><br>(µg.day/mL)† | 80.63<br>(25.66)                         | 232.43<br>(48.90)                      | 66.03<br>(31.62)           | 107.88<br>(43.05)          | 49.38<br>(23.15)       | 29.08<br>(10.65)          | 188.67<br>(90.43)          | 172.04<br>(86.17)          | 83.52<br>(35.17)                       | 52.02 (22.03)          |
| t <sub>1/2</sub> (day)                 | NA                                       | 18.3 (4.5)                             | NA                         | NA                         | NA                     | NA                        | 19.0<br>(4.3)              | 16.0<br>(4.1)              | 16.1 (4.8)                             | 14.9 (4.5)             |
| R <sub>Cmax</sub>                      | NA                                       | 2.7 (1.1)                              | NA                         | NA                         | NA                     | NA                        | 2.6 (1.0)                  | 1.5<br>(0.9)               | 1.7 (0.6)                              | 1.6 (0.6)              |
| R <sub>AUC(0-14d)</sub>                | NA                                       | 2.7 (0.5)                              | NA                         | NA                         | NA                     | NA                        | 3.0 (1.2)                  | 1.6<br>(0.8)               | 1.8 (0.6)                              | 1.7 (0.4)              |

Data presented as mean (SD) or median [range] unless noted otherwise. \* Data from one of the study sites that participated in Part A were excluded from all pharmacokinetics analyses due to questionable data integrity. † AUC<sub>(t1-t2)</sub>, area under the serum concentration versus time curve between 2 defined sampling timepoints (AUC<sub>0-14d</sub> was reported for the every-2-week treatment group; AUC<sub>0-28d</sub> was reported for q4w treatment groups); PK, pharmacokinetic; C<sub>max</sub>, observed maximum serum concentration; NA, not available; R<sub>AUC(t1-t2)</sub>, accumulation ratio calculated from AUC<sub>(t1-t2)</sub> after the last dose of multiple doses and AUC<sub>(t1-t2)</sub> after the first dose; R<sub>Cmax</sub>, accumulation ratio calculated from C<sub>max</sub> after the last dose of multiple doses and C<sub>max</sub> after the first dose; t<sub>1/2</sub>, terminal half-life; t<sub>max</sub>, observed time to reach maximum serum concentration.
